# Supplementary material
Source: publisher figshare collection journal article supplement (https://gsapubs.figshare.com/ndownloader/files/23320832)
Supplement: Supplementary file 1 [file 23320832]

## Sheet: Appendix 5
EVIDENCE FOR MIXED CONTRIBUTION OF MANTLE, LOWER AND UPPER CRUST TO THE GENESIS OF JURASSIC I-TYPE GRANITES FROM MACAO, SE CHINA
Quelhas et al. (GSA Bulletin)
Appendix 5
Whole-rock major and trace element compositions of Macao granites and microgranular mafic enclaves
Sample	T33	T43	T43R	T22	T29	T35	T42	C52	C58	C33	C33R	C64	C51	C 60	C29	C66	C47	C42	C37	C63	C68	T39	T17	T37	T41	T38	T31	M16	M18	T44	T28	C70	C 71	T51	C57	T50	M29B	M35	M06	M21.B	M19	M25	M34R2	M03	M34	M34R	T36	M20	M31
Group	MGI WMF	MGI WMF	MGI WMF	MGI WMF	MGI WMF	MGI WMF	MGI WMF	MGI WMF	MGI WMF	MGI WMF	MGI WMF	MGI WMF	MGI WMF	MGI WMF	MGI WMF	MGI WMF	MGI WMF	MGI WMF	MGI WMF	MGI WMF	MGI WMF	MGI HF	MGI HF	MGI HF	MGI HF	MGI HF	MGI HF	MGI HF	MGI HF	MGI HF	MGI HF	MGI HF	MGI HF	MGI HF	MGI HF	MGI HF	MGII WMF	MGII WMF	MGII WMF	MGII WMF	MGII WMF	MGII WMF	MGII WMF	MGII WMF	MGII WMF	MGII WMF	MGII WMF	MGII HF	MGII HF
Major elements (wt%)
SiO2	72.46	75.44	75.73	73.96	73.86	73.92	74.60	74.83	74.60	73.26	74.25	73.48	72.23	74.13	74.73	73.45	74.48	74.43	73.38	75.90	74.52	75.47	75.51	76.18	75.00	73.96	75.80	73.47	75.44	75.72	76.92	74.98	75.71	75.51	76.14	75.49	72.67	72.54	73.88	70.84	68.19	74.89	72.08	72.31	72.85	73.08	66.77	74.78	76.51
Al2O3	13.43	11.82	12.57	12.84	12.93	13.47	12.67	12.95	13.34	13.19	13.28	13.77	13.44	13.46	13.11	13.73	12.81	13.88	12.68	12.93	13.22	12.72	12.35	12.52	12.59	13.02	13.12	12.92	12.42	12.68	12.31	12.86	12.64	12.17	12.62	12.72	13.36	13.29	12.58	13.53	14.80	12.96	13.69	12.86	13.37	13.35	14.19	12.85	12.82
Fe2O3T	2.70	2.26	2.51	2.12	2.13	2.22	1.87	2.12	2.19	2.29	2.44	2.28	2.39	2.51	1.88	2.34	2.57	2.14	2.41	1.84	2.41	1.82	2.38	2.08	1.93	1.90	1.73	2.83	1.42	1.34	1.79	1.20	1.38	1.45	1.30	1.89	2.39	2.97	2.75	3.15	3.30	1.65	2.54	2.75	2.98	2.51	5.11	0.97	1.35
MnO	0.094	0.059	0.061	0.063	0.079	0.064	0.062	0.059	0.070	0.063	0.064	0.073	0.062	0.078	0.068	0.060	0.065	0.080	0.070	0.042	0.070	0.037	0.099	0.069	0.024	0.071	0.089	0.057	0.046	0.039	0.038	0.037	0.057	0.019	0.188	0.046	0.062	0.073	0.068	0.079	0.076	0.028	0.072	0.072	0.074	0.071	0.128	0.019	0.028
MgO	0.34	0.19	0.20	0.14	0.14	0.14	0.11	0.14	0.19	0.27	0.27	0.18	0.28	0.26	0.08	0.22	0.15	0.12	0.25	0.10	0.20	0.08	0.07	0.08	0.07	0.08	0.06	0.08	0.08	0.02	0.02	0.04	0.08	0.02	0.03	0.08	0.26	0.45	0.25	0.54	0.53	0.14	0.33	0.32	0.32	0.33	0.94	0.05	0.08
CaO	1.19	1.10	1.12	0.89	1.02	1.09	1.02	1.00	1.33	1.34	1.35	1.34	1.38	1.41	0.91	1.26	1.11	1.12	1.00	1.09	1.28	0.32	0.65	0.73	0.62	0.80	0.76	0.59	0.76	0.50	0.59	0.99	0.62	0.56	0.59	0.84	1.21	1.68	1.27	1.91	1.97	0.88	1.58	1.48	1.56	1.58	2.56	0.95	0.63
Na2O	3.25	2.90	3.06	3.60	3.30	3.72	3.47	3.24	3.41	3.35	3.40	3.30	3.09	3.32	3.17	3.17	3.37	3.35	3.06	3.15	3.32	3.45	3.91	3.90	3.69	3.54	3.70	3.48	3.70	3.96	4.26	3.73	3.22	3.33	4.06	3.43	3.27	3.05	3.11	3.11	2.89	3.18	3.44	3.31	3.45	3.50	3.28	3.15	3.40
K2O	4.82	4.14	4.42	4.71	4.58	4.61	4.57	4.71	4.57	4.79	4.85	4.91	5.01	4.37	4.72	5.06	4.96	4.84	4.77	4.94	4.62	4.61	4.47	4.66	4.92	4.76	4.44	4.54	4.54	5.00	4.22	3.92	4.78	5.01	4.11	4.64	4.52	4.65	4.80	4.91	5.36	4.74	4.81	4.76	4.66	4.75	4.65	5.05	4.91
TiO2	0.20	0.14	0.14	0.11	0.11	0.11	0.09	0.11	0.14	0.20	0.19	0.14	0.19	0.17	0.08	0.16	0.12	0.11	0.19	0.09	0.14	0.08	0.06	0.06	0.06	0.06	0.06	0.08	0.06	0.02	0.04	0.03	0.04	0.02	0.01	0.08	0.21	0.33	0.21	0.37	0.39	0.14	0.25	0.24	0.25	0.25	0.63	0.06	0.08
P2O5	0.080	0.030	0.040	0.000	0.040	0.020	0.030	0.040	0.030	0.040	0.050	0.030	0.060	0.060	0.000	0.040	0.020	0.020	0.050	0.030	0.040	0.010	0.000	0.000	0.000	0.010	0.010	0.070	0.010	0.000	0.000	0.000	0.010	0.000	0.000	0.020	0.050	0.110	0.070	0.110	0.130	0.040	0.080	0.050	0.070	0.080	0.200	0.000	0.020
LOI	0.80	0.71	0.58	0.44	0.65	1.18	0.62	0.40	0.60	0.54	0.51	0.75	0.69	0.57	0.66	0.79	0.29	0.64	0.68	0.80	0.51	0.71	0.36	0.45	0.34	0.67	0.67	0.64	0.32	0.09	0.15	0.82	0.49	0.46	0.56	0.54	0.80	0.67	0.49	0.68	1.43	0.90	0.56	0.37	0.31	0.42	0.74	0.62	0.67
Total	99.4	98.8	100.4	98.9	98.8	100.6	99.1	99.6	100.5	99.3	100.7	100.3	98.8	100.3	99.4	100.3	100.0	100.7	98.5	100.9	100.3	99.3	99.9	100.7	99.3	98.9	100.4	98.8	98.8	99.4	100.3	98.6	99.0	98.5	99.6	99.8	98.8	99.8	99.5	99.2	99.1	99.5	99.4	98.5	99.9	99.9	99.2	98.5	100.5
FeOT	2.43	2.03	2.26	1.91	1.92	2.00	1.68	1.91	1.97	2.06	2.20	2.05	2.15	2.26	1.69	2.11	2.31	1.93	2.17	1.66	2.17	1.64	2.14	1.87	1.74	1.71	1.56	2.55	1.28	1.21	1.61	1.08	1.24	1.30	1.17	1.70	2.15	2.67	2.47	2.83	2.97	1.48	2.29	2.47	2.68	2.26	4.60	0.87	1.21
K2O/Na2O	1.48	1.43	1.44	1.31	1.39	1.24	1.32	1.45	1.34	1.43	1.43	1.49	1.62	1.32	1.49	1.60	1.47	1.44	1.56	1.57	1.39	1.34	1.14	1.19	1.33	1.34	1.20	1.30	1.23	1.26	0.99	1.05	1.48	1.50	1.01	1.35	1.38	1.52	1.54	1.58	1.85	1.49	1.40	1.44	1.35	1.36	1.42	1.60	1.44
A/CNK	1.06	1.05	1.06	1.02	1.06	1.03	1.02	1.06	1.03	1.01	1.00	1.05	1.04	1.06	1.09	1.06	0.99	1.09	1.06	1.04	1.04	1.13	0.99	0.98	1.01	1.05	1.07	1.11	1.00	0.99	0.97	1.06	1.09	1.02	1.03	1.05	1.08	1.02	1.00	0.98	1.06	1.09	1.00	0.97	0.99	0.98	0.96	1.04	1.07
Trace elements (ppm)
Au	0	0	0	0	0	0	2	0	0	0	0	0	0	0	0	3	0	0	1	0	0	0	0	0	0	0	0	0	0	0	0	0	0	4	0	0	9	8	0	0	0	0	0	0	0	0	0	0	0
Ag	0.00	0.00	0.00	0.00	0.00	0.00	0.00	0.00	0.00	0.00	0.00	0.00	0.00	0.00	0.00	0.00	0.00	0.00	0.00	0.00	0.00	0.00	0.00	0.00	0.00	0.00	0.00	0.00	0.00	0.00	0.00	0.00	0.00	0.00	0.00	0.00	0.00	0.00	0.00	0.00	0.00	0.00	0.00	0.00	0.00	0.00	0.00	0.00	0.00
As	6	2	2	0	3	2	1	1	3	0	1	2	2	1	2	3	2	1	1	1	3	2	1	0	1	2	4	24	0	0	0	1	2	3	1	1	8	5	1	0	4	6	1	0	0	0	0	0	5
Ba	393	201	209	191	181	122	176	205	248	216	219	208	264	249	94	230	135	295	101	118	278	43	47	47	62	60	42	30	91	15	17	18	5	52	49	70	156	356	278	462	625	103	303	227	296	301	526	37	23
Be	6	7	7	6	7	6	7	5	4	7	7	4	8	6	4	6	7	8	8	7	5	6	7	7	6	6	7	10	7	13	7	6	8	9	18	7	7	8	7	8	9	6	10	8	9	9	6	8	7
Bi	0.8	0	0	0	0	1.5	0.1	0.2	0.3	0.3	0.2	1.3	0.4	0.3	0.2	0.3	0	0.5	0.6	0.5	0.3	0.5	0	1.4	1	0.1	1.1	1.1	0.1	0.3	0	0.4	0.8	0.2	0.3	0	0.2	0.6	0.6	2.8	0.5	0.8	0	0	0	0	2	0	0.3
Br	0	0	0	0	0	0	0	0	0	0	0	0	0	0	0	0	0	0	0	0	0	0	0	0	0	0	0	0	0	0	0	0	0	0	0	0	0	0	0	0	0	0	0	0	0	0	0	0	0
Cd	0	0	0	0	0	0	0	0	0	0	0	0	0	0	0	0	0	0	0	0	0	0	0	0	0	0	0	0	0	0	0	0	0	0	0	0	0	0	0	0	0	0	0	0	0	0	0	0	0
Co	7	3.3	3.8	0	4.6	1	3.3	3.1	3.6	4.7	3.1	3.1	4.3	5.2	2.9	4	0	3.9	3.9	3.3	2.8	2.5	0	0	0	2.6	3.2	3.1	1.7	0	2.2	1.4	1.4	2	3	3.5	2.9	5.1	2.9	3.5	7.4	4	3.9	4.4	2.8	3.6	7.4	0	0.8
Cr	165	102	102	25.5	90.9	65.6	71.2	91.8	70.7	103	100	76.5	88.2	37.8	72.8	121	76.4	79.2	84.8	35.1	99.1	116	130	75	25.6	122	176	77.1	103	50	57.1	110	47.2	124	237	43.4	89.9	91.5	67.9	73.8	71.7	82.1	99.9	89.5	92.1	83.8	45.2	58.8	75.1
Cs	12	10.3	10.1	9.7	12.6	13.2	8.6	11.3	10.5	17.5	17.3	9	18.7	12.9	7.8	14.7	12.4	16.3	20.4	12.3	13	12.9	10.7	9.7	6.4	9	13.2	10.9	8.7	10.6	7.5	3.4	10.3	10.2	4	9.5	10.4	9.7	7.3	10.8	9.6	7.5	9.4	11.4	9.6	9.7	10.7	5.8	7.8
Cu	16	13	8	3	14	14	12	13	7	7	5	11	8	5	31	10	4	25	9	6	6	9	5	5	25	62	61	35	6	5	8	12	10	48	21	13	171	89	19	26	56	17	5	7	5	3	10	13	22
Ga	19	15	15	17	17	18	17	16	16	18	18	16	18	17	15	17	18	17	18	16	16	18	18	18	17	17	18	19	18	21	18	17	17	19	20	17	17	16	17	18	18	16	18	18	18	18	20	16	16
Ge	1.7	1.7	1.7	2.1	2	1.8	1.8	1.7	1.8	2.3	2.2	1.7	1.7	1.8	1.9	2	2.2	2	2.1	1.7	1.7	2.2	2.5	2.4	1.9	1.8	2	2.3	2.1	3.3	2.6	2	2	2.7	2.6	1.5	2	1.9	1.9	2.1	1.7	2	2.2	2.3	2.3	2.4	2.2	1.9	2
Hf	5	3.4	3.3	3.6	3.9	3.9	3.1	3.4	3.1	3.9	4	3.1	3.8	4.1	3.1	4.3	4.2	4.5	3.5	3.9	4	3.1	3.6	3.7	2.5	3	3.5	3.9	3.8	5.6	2.4	2.7	4.1	4.2	5.8	3	4.7	4.5	4.2	4.9	5.3	3.6	3.8	3.8	5	4.4	6.8	2.6	3.5
Hg	0.00	0.00	0.00	0.00	0.00	0.00	0.00	0.00	0.00	0.00	0.00	0.00	0.00	0.00	0.00	0.00	0.00	0.00	0.00	0.00	0.00	0.00	0.00	0.00	0.00	0.00	0.00	0.00	0.00	0.00	0.00	0.00	0.00	0.00	0.00	0.00	0.00	0.00	0.00	0.00	0.00	0.00	0.00	0.00	0.00	0.00	0.00	0.00	0.00
In	0	0	0	0	0	0	0	0	0	0	0	0	0	0	0	0	0	0	0	0	0	0	0	0	0	0	0	0.1	0	0	0	0	0	0	0	0	0	0	0	0	0	0	0	0	0	0	0	0	0
Ir	0	0	0	0	0	0	0	0	0	0	0	0	0	2	0	0	0	0	0	0	0	0	0	0	0	0	0	1	0	0	0	0	0	0	0	0	0	0	0	0	0	0	0	0	0	0	0	0	0
Mo	3	0	0	3	3	0	0	0	0	3	3	0	0	0	0	0	3	0	0	0	0	0	3	4	15	0	0	0	2	0	0	0	0	0	0	0	0	0	2	3	0	0	0	2	2	2	2	0	4
Nb	16	11.3	12	14.7	13.8	15.8	11.3	10.4	13.3	17.1	16.2	9.9	14.9	14.1	8.3	16.4	11.7	11.8	14.5	9.7	11.6	26.6	20.8	28.5	15.7	12.9	18.8	37.9	20.2	27.8	36	16.9	9.7	43.3	15.5	11.9	14.8	11.9	13.3	14.1	13.5	11.5	16.7	12.4	19.7	15.5	18.7	8.9	14.6
Ni	77	68	48	14	189	34	34	49	43	35	34	44	54	16	42	57	41	35	45	20	50	46	55	28	10	40	55	42	39	29	31	78	19	58	90	28	42	56	29	44	28	41	54	50	41	51	19	33	37
Pb	42	28	31	35	40	38	38	35	29	43	41	35	44	27	35	42	43	34	44	33	29	41	41	41	42	44	43	62	44	53	48	36	77	47	51	39	37	28	27	26	31	39	35	36	32	36	38	41	51
Rb	373	292	297	364	375	341	328	301	255	378	376	278	396	292	265	356	393	351	418	283	253	373	419	410	329	359	436	405	384	416	356	247	365	374	326	333	427	357	342	351	371	414	388	418	387	391	312	386	455
S	0.051	0.011	0.007	0.002	0.007	0.038	0.006	0.003	0.003	0.008	0.006	0.007	0.006	0.002	0.004	0.004	0.007	0.009	0.003	0.002	0.002	0.005	0.005	0.02	0.16	0.018	0.011	0.018	0.011	0.007	0.002	0.004	0.004	0.033	0.007	0.038	0.056	0.032	0.049	0.015	0.143	0.008	0.005	0.01	0.006	0.003	0.055	0.03	0.044
Sb	0.5	0.2	0.4	0.3	0.4	0.2	0.2	0.3	0.4	0.3	0.3	0.3	0.6	0.4	0.3	0.4	0.2	0.4	0.3	0.4	0.4	0.3	0.2	0.3	0	0.2	0.3	0.5	0	0.3	0.1	0.2	0.4	0.2	0.1	0.2	0.4	0.4	0.2	0.2	0.1	0.3	0.3	0.2	0.2	0.2	0	0.3	0.3
Sc	5.1	3.2	3	3.86	3.8	5.2	3.2	2.6	3.6	5.03	4.9	3.2	4.3	4	2.4	4.8	4.4	4.2	5	2.4	3.85	4.5	4.33	4.16	3.18	3.4	3.8	4.9	3.78	2.27	2.74	1.8	2.4	1.4	5.1	2.7	4.2	4.9	4.88	5.8	6.6	2.8	4.75	4.58	5.44	5.27	11.6	2.3	2.9
Se	0	0	0	1.4	0	0	0	0	0	0	0	0	0	1.7	0	0	1.2	0	0	0	0	0	0.7	0	0	0	3.4	0	0	0	0	0	3.3	2.9	0	0	0	0	0	0	0	0	0	0	1	0	0	0	0
Sn	70	41	21	9	11	6	7	6	23	10	10	17	33	7	36	11	11	40	13	23	19	49	10	8	2	89	98	712	7	6	5	15	5	55	30	6	316	151	5	11	628	141	16	8	9	8	13	5	86
Sr	121	84	91	70	61	54	81	71	94	86	88	86	98	104	49	84	56	83	50	58	97	29	29	33	40	44	30	24	38	9	16	46	14	41	89	44	76	144	97	181	210	57	130	105	127	128	222	41	25
Ta	3	2.04	2.09	3.6	3.51	3.75	2.73	2.27	1.9	5.03	5.1	1.5	3.69	2.97	1.43	3.25	4.01	4.05	3.97	2.86	2.09	6.56	4.81	6.31	4.03	3.59	4.12	11.1	7.26	9.82	6.37	3.73	3.58	9.8	5.18	3.31	2.81	2.1	3	3.1	2.31	2.43	3.38	3.53	3.85	3.71	3.05	1.98	2.4
Th	37.6	28.4	27.4	30	37.4	42.7	31.8	35.2	29.2	36.7	38.4	32	38.8	34.9	34.5	36.8	45.7	34.1	42.9	43.3	34.1	38.3	31.4	30	28.9	31.6	32.7	33	24.8	19.6	24.8	33.4	36	22.1	18.1	32	35.8	33.7	41.4	33.8	30.1	33.2	29.7	30.2	30.8	30.6	38.1	22.3	33.7
U	11.3	8.92	8.48	10.8	14.7	16	8.62	12.4	7.54	13.8	14.8	7.81	12.4	8.4	5.29	21.3	12.8	8.35	11.3	8.85	6.8	18.3	16.4	16.3	42.1	13.8	18.1	32.4	16.8	31	26.1	13.7	9.97	46.3	20.5	13.1	12.6	13.7	9.29	12	12.1	16	18.6	19.2	15	14.8	9.79	13.4	18.9
V	16	10	11	11	6	6	6	8	9	16	17	9	16	13	0	12	10	0	10	5	9	0	6	7	6	0	0	6	5	5	6	0	0	0	0	0	15	27	14	34	32	11	23	24	23	23	55	0	0
W	14	0	2	0	1	0	0	0	0	0	0	37	0	0	0	0	0	0	0	0	0	2	0	0	0	2	2	41	3	0	0	0	0	0	0	0	10	14	0	30	51	6	0	0	0	0	12	0	1
Y	38	42	41	49	53	56	40	38	32	53	54	31	34	43	23	58	50	32	53	34	34	89	99	95	63	63	88	97	88	94	90	31	48	74	212	36	37	36	47	38	32	39	41	39	43	43	49	11	24
Zn	41	25	24	31	33	25	26	26	35	41	36	39	41	32	33	39	42	36	41	33	37	32	41	23	11	27	31	78	24	9	13	17	24	8	17	17	26	38	39	46	44	25	37	43	40	35	84	6	18
Zr	170	96	97	99	106	107	82	97	98	117	121	98	122	122	94	127	109	134	100	101	126	60	77	76	59	75	77	76	77	70	42	49	78	63	71	74	149	154	153	166	191	97	111	120	138	126	245	47	79
La	49.5	21.4	22.2	25.1	25.3	22.3	19.9	23.8	21.9	32.5	32.9	29.9	38	28.7	21.7	32.4	28.4	34.5	30.3	27.1	35.6	18.1	11.1	11.9	11.5	12	11.3	21.6	14.2	8.34	9.6	7.02	8.26	6.74	5.36	14.7	26	34.1	40.6	39.2	43.1	30.5	26	24.9	26.7	26.6	61.6	10.6	13.5
Ce	100	46	47.7	51.6	54.3	51.3	44.4	52.1	46.7	69.3	69.5	59.3	80.4	59	46.3	69.5	62.3	72.6	67.1	58.3	73.4	39	27.6	28.8	26.2	28.5	27.8	50.1	32.4	21.6	14.9	18.5	22.4	13.1	12.8	33.6	55.2	68.7	86.6	81.5	91.2	44.1	55.2	52.1	56	55.9	129	21.7	28.3
Pr	10.8	5.45	5.54	6.24	6.38	6.28	5.41	6.2	5.53	8.23	8.38	7.02	8.99	7.01	5.45	7.98	7.47	8.42	8	6.78	8.42	5.43	3.91	3.99	3.44	3.85	3.86	6.38	4.29	3.34	3.38	2.53	3.2	2.02	2.17	4.08	6.22	7.82	10.2	9.53	10.2	6.82	6.21	6.03	6.43	6.53	15	2.25	3.03
Nd	37.3	20.7	21	24	24	24.9	20.6	23.1	20.3	31.4	30.9	25.2	31.8	25.8	20.2	28.9	28.5	31.2	29.1	23.9	29.9	22.5	18	18.4	14.5	15.3	16.9	26.2	17.6	14.5	15.5	10.1	13.3	8.23	11.1	16	21.7	27.6	38.2	36	36.1	23.3	22.3	22	24	24.3	55	7.05	9.81
Sm	7.61	5.71	5.61	6.37	6.49	7.27	5.8	5.99	5.29	8	8.01	6.02	7.25	6.41	4.73	7.87	7.33	7.2	7.86	5.7	6.62	8.81	8.36	7.98	5.69	6.1	7.54	10	7.28	7.64	7.3	4.04	5.15	4.14	8.59	4.98	5.38	5.81	8.88	7.71	7.27	5.27	5.03	5.09	5.42	5.52	11.8	1.37	2.26
Eu	0.746	0.559	0.517	0.486	0.438	0.393	0.445	0.5	0.575	0.6	0.656	0.574	0.694	0.617	0.346	0.648	0.486	0.613	0.46	0.482	0.651	0.196	0.233	0.244	0.292	0.25	0.218	0.228	0.29	0.086	0.138	0.28	0.178	0.163	0.087	0.329	0.535	0.919	0.856	1.1	1.2	0.576	0.703	0.684	0.792	0.786	1.52	0.226	0.179
Gd	7.41	6.14	6.27	6.77	7.5	8.15	6.18	5.87	5.55	7.52	7.56	5.4	6.49	6.78	3.89	7.89	7.28	6.2	8.1	4.89	6.18	11.8	12.6	10.9	7.38	8.26	11.6	13.6	9.62	8.93	10.6	4.82	5.94	6.44	15.4	5.05	5.38	5.58	7.74	6.72	6.29	5.15	4.88	4.79	5.11	5.43	9.6	1.17	2.6
Tb	1.17	1.1	1.07	1.21	1.41	1.5	1.09	1.02	0.94	1.39	1.39	0.88	1.04	1.2	0.61	1.42	1.26	0.96	1.41	0.83	0.99	2.34	2.57	2.32	1.49	1.67	2.39	2.78	2	2.01	2.27	0.9	1.11	1.53	3.58	0.91	0.97	0.91	1.28	1.06	0.95	0.88	0.87	0.87	0.92	0.96	1.52	0.21	0.48
Dy	7.14	7.36	6.98	7.49	9.11	9.77	7.39	6.52	5.77	8.57	8.79	5.47	6.45	7.59	3.77	9.47	8.11	5.68	9.02	5.38	6.04	16.2	16.8	15.8	10	11.2	16.6	18.6	13.7	13.9	15.6	6.21	7.42	11.2	27.2	6.19	6.39	5.93	8.05	6.48	5.79	5.78	6.19	5.63	6.02	6.08	8.68	1.32	3.13
Ho	1.39	1.53	1.42	1.54	1.89	2	1.49	1.34	1.11	1.67	1.75	1.04	1.29	1.51	0.77	1.94	1.65	1.13	1.81	1.12	1.18	3.28	3.48	3.24	2.12	2.27	3.35	3.77	2.79	2.97	3.27	1.3	1.58	2.5	6.28	1.3	1.3	1.26	1.58	1.25	1.17	1.22	1.34	1.2	1.29	1.31	1.71	0.29	0.74
Er	4.06	4.52	4.24	4.83	5.71	6.11	4.47	4.13	3.34	5.25	5.35	3.14	3.71	4.7	2.39	6.04	4.95	3.23	5.53	3.57	3.59	10.3	10.4	9.88	6.45	6.86	10.1	11.3	8.79	10	10.1	3.93	4.97	8.01	22.2	3.93	3.99	4.06	4.88	4.04	3.64	4.04	4.34	3.96	4.29	4.37	5.06	1.14	2.78
Tm	0.620	0.702	0.675	0.810	0.860	0.932	0.706	0.644	0.507	0.891	0.855	0.493	0.563	0.716	0.382	0.925	0.803	0.499	0.846	0.586	0.556	1.660	1.690	1.550	1.070	1.020	1.540	1.740	1.500	1.860	1.600	0.621	0.902	1.290	4.070	0.621	0.638	0.665	0.801	0.642	0.591	0.683	0.773	0.748	0.778	0.793	0.792	0.230	0.499
Yb	4.31	5.04	4.51	5.37	5.9	6.18	5.07	4.42	3.43	5.92	6.13	3.35	3.78	5.08	2.68	6.43	5.35	3.53	5.91	4.41	3.83	10.8	11	10.8	7.41	6.78	10.1	12.2	10.4	14.2	10.8	4.38	6.75	9.04	31.4	4.15	4.71	5.09	5.48	4.77	4.29	5.37	5.92	5.37	5.97	6.14	5.47	2.36	4.48
Lu	0.671	0.743	0.689	0.827	0.948	1.01	0.803	0.702	0.553	0.902	0.929	0.536	0.573	0.787	0.465	0.962	0.825	0.592	0.909	0.717	0.592	1.61	1.64	1.64	1.19	1.1	1.45	1.82	1.64	2.28	1.63	0.658	1.08	1.51	5.37	0.653	0.782	0.849	0.807	0.742	0.71	0.907	0.97	0.958	1.05	1.03	0.846	0.446	0.856
Tl	1.68	1.3	1.3	1.9	1.68	1.63	1.41	1.28	1.13	2.09	2.04	1.2	1.76	1.19	0.78	1.71	2.09	1.25	1.95	1.16	1.03	1.47	2	2.08	1.68	1.52	1.85	1.82	1.85	1.77	1.68	1.03	1.47	1.55	1.46	1.39	1.92	1.7	1.63	1.94	1.85	1.84	1.52	1.9	1.76	1.85	1.74	1.71	1.79
Zr/Hf	34.00	28.24	29.39	27.50	27.18	27.44	26.45	28.53	31.61	30.00	30.25	31.61	32.11	29.76	30.32	29.53	25.95	29.78	28.57	25.90	31.50	19.35	21.39	20.54	23.60	25.00	22.00	19.49	20.26	12.50	17.50	18.15	19.02	15.00	12.24	24.67	31.70	34.22	36.43	33.88	36.04	26.94	29.21	31.58	27.60	28.64	36.03	18.08	22.57
Y/Ho	27.34	27.45	28.87	31.82	28.04	28.00	26.85	28.36	28.83	31.74	30.86	29.81	26.36	28.48	29.87	29.90	30.30	28.32	29.28	30.36	28.81	27.13	28.45	29.32	29.72	27.75	26.27	25.73	31.54	31.65	27.52	23.85	30.38	29.60	33.76	27.69	28.46	28.57	29.75	30.40	27.35	31.97	30.60	32.50	33.33	32.82	28.65	37.93	32.43
(La/Yb)N	7.80	2.88	3.34	3.18	2.91	2.45	2.67	3.66	4.34	3.73	3.65	6.06	6.83	3.84	5.50	3.42	3.61	6.64	3.48	4.17	6.31	1.14	0.69	0.75	1.05	1.20	0.76	1.20	0.93	0.40	0.60	1.09	0.83	0.51	0.12	2.41	3.75	4.55	5.03	5.58	6.82	3.86	2.98	3.15	3.04	2.94	7.65	3.05	2.05
Th/La	0.76	1.33	1.23	1.20	1.48	1.91	1.60	1.48	1.33	1.13	1.17	1.07	1.02	1.22	1.59	1.14	1.61	0.99	1.42	1.60	0.96	2.12	2.83	2.52	2.51	2.63	2.89	1.53	1.75	2.35	2.58	4.76	4.36	3.28	3.38	2.18	1.38	0.99	1.02	0.86	0.70	1.09	1.14	1.21	1.15	1.15	0.62	2.10	2.50
Sm/La	0.15	0.27	0.25	0.25	0.26	0.33	0.29	0.25	0.24	0.25	0.24	0.20	0.19	0.22	0.22	0.24	0.26	0.21	0.26	0.21	0.19	0.49	0.75	0.67	0.49	0.51	0.67	0.46	0.51	0.92	0.76	0.58	0.62	0.61	1.60	0.34	0.21	0.17	0.22	0.20	0.17	0.17	0.19	0.20	0.20	0.21	0.19	0.13	0.17
Sm/Nd	0.20	0.28	0.27	0.27	0.27	0.29	0.28	0.26	0.26	0.25	0.26	0.24	0.23	0.25	0.23	0.27	0.26	0.23	0.27	0.24	0.22	0.39	0.46	0.43	0.39	0.40	0.45	0.38	0.41	0.53	0.47	0.40	0.39	0.50	0.77	0.31	0.25	0.21	0.23	0.21	0.20	0.23	0.23	0.23	0.23	0.23	0.21	0.19	0.23
Lu/Gd	0.09	0.12	0.11	0.12	0.13	0.12	0.13	0.12	0.10	0.12	0.12	0.10	0.09	0.12	0.12	0.12	0.11	0.10	0.11	0.15	0.10	0.14	0.13	0.15	0.16	0.13	0.13	0.13	0.17	0.26	0.15	0.14	0.18	0.23	0.35	0.13	0.15	0.15	0.10	0.11	0.11	0.18	0.20	0.20	0.21	0.19	0.09	0.38	0.33
Eu/Eu*	0.30	0.29	0.27	0.23	0.19	0.16	0.23	0.26	0.32	0.24	0.26	0.31	0.31	0.29	0.25	0.25	0.20	0.28	0.18	0.28	0.31	0.06	0.07	0.08	0.14	0.11	0.07	0.06	0.11	0.03	0.05	0.19	0.10	0.10	0.02	0.20	0.30	0.49	0.31	0.47	0.54	0.34	0.43	0.42	0.46	0.44	0.44	0.54	0.23
TE1,3	1.05	1.06	1.05	1.05	1.07	1.08	1.07	1.06	1.07	1.08	1.08	1.05	1.05	1.06	1.03	1.08	1.06	1.03	1.08	1.06	1.05	1.07	1.08	1.09	1.07	1.11	1.10	1.10	1.10	1.13	0.97	1.11	1.10	1.07	1.05	1.06	1.09	1.03	1.05	1.04	1.04	0.97	1.06	1.06	1.05	1.04	1.04236	1.08243	1.06785
M	1.37	1.31	1.32	1.40	1.34	1.39	1.39	1.33	1.39	1.43	1.44	1.38	1.40	1.36	1.28	1.36	1.44	1.32	1.34	1.36	1.38	1.23	1.42	1.43	1.40	1.35	1.31	1.29	1.39	1.42	1.43	1.32	1.27	1.35	1.35	1.34	1.34	1.43	1.43	1.52	1.46	1.29	1.47	1.49	1.47	1.50	1.66406	1.34394	1.30735
TZr (ºC)	793.2	749.5	749.7	745.8	755.4	752.3	731.4	748.6	745.7	757.1	759.4	746.1	762.7	765.8	749.4	768.7	750.9	776.4	750.5	750.2	767.0	717.7	724.7	722.5	705.6	726.9	731.5	732.3	726.5	717.1	679.1	697.0	735.4	713.4	723.1	726.6	784.0	780.3	780.0	780.2	797.1	751.3	750.2	754.9	767.7	758.5	803.6	692.4	733.9
Note: LOI: Loss on Ignition; Eu/Eu* is a measure of the Eu anomaly when compared to Sm and Gd: Eu/Eu* = EuN/[(SmN) × (GdN)]0.5; A/CNK=molar Al2O3/(CaO+Na2O+K2O); Degree of the tetrad effect (Irber, 1999) = TE1,3 = (t1 x t3)0.5, where t1 = (Ce/Cet × Pr/Prt)0.5 and t3 = (Tb/Tbt × Dy/Dyt)0.5, with Pr/Prt = PrN/(LaN1/3 × NdN2/3), Tb/Tbt = TbN/(GdN2/3 × HoN1/3) and Dy/Dyt = DyN/(GdN1/3 × HoN2/3); TZr …
[truncated: 4 more columns]
